# Supplementary material for: Budgerigars have complex sleep structure similar to that of mammals
Source: PLoS Biol. 2020 Nov 17;18(11):e3000929. doi: 10.1371/journal.pbio.3000929 (PMC7707536; doi:10.1371/journal.pbio.3000929)
Supplement: S1 Data — (XLSX) [file pbio.3000929.s007.xlsx]

## Sheet: Fig 1 Twitches
EVENTS FROM VIDEO SCORING NOTES
VISIBLE EYE MOVEMENTS
	Bird 1	Bird 2	Bird 3	Bird 4
Drowsy	3	0	0	1
IS	6	4	1	0
REM	42	1	0	0
SWS	3	3	0	0
US	0	0	0	0
Wake	0	0	0	0
TWITCHING EPISODE STARTS
	Bird 1	Bird 2	Bird 3	Bird 4	Bird 5
Drowsy	21	17	5	4	6
IS	80	164	53	16	16
REM	141	453	46	17	20
SWS	42	26	9	11	8
US	0	0	0	0	0
Wake	7	9	0	0	1
HEAD DROOPING
	Bird 1	Bird 2	Bird 3	Bird 4	Bird 5
Drowsy	5	4	2	5	0
IS	5	0	0	1	1
REM	9	1	0	2	0
SWS	1	0	0	1	0
US	0	0	0	0	0
Wake	0	1	0	1	4
BEAK MOVEMENTS
	Bird 1	Bird 2	Bird 3	Bird 4	Bird 5
Drowsy	17	0	0	1	0
IS	101	0	0	2	0
REM	37	0	0	0	1
SWS	14	0	0	1	0
US	0	0	0	0	0
Wake	36	2	2	2	1

## Sheet: Fig 2b Stages by hour
HOUR OF 24-HR RECORDING (ZEITGEBER HOUR)
MEANS	0	1	2	3	4	5	-1	TST	U (% TST)	I (% TST)	S (% TST)	R (% TST)
0	0.468093	0.363207	0.000833333	0.109672	0.0290792	0.0291142	0	0.168699	0.00840336	0.755257	0.115671	0.120669
1	0.481881	0.298962	0.0139015	0.109078	0.0484116	0.047767	0	0.175326	0.147343	0.501146	0.176774	0.174737
2	0.428637	0.280888	0.0137707	0.169853	0.0673947	0.0391073	0.00034926	0.290126	0.099739	0.585904	0.22698	0.0873769
3	0.496167	0.305167	0.032	0.105667	0.0323333	0.0283333	0.000333333	0.198333	0.350558	0.473253	0.108406	0.0677828
4	0.527	0.346	0.0108333	0.0778333	0.0193333	0.019	0	0.127	0.296448	0.543765	0.0872742	0.0725125
5	0.469465	0.374351	0.0290092	0.0813386	0.0236694	0.022	0.000166667	0.156017	0.301501	0.474137	0.155549	0.0688128
6	0.408091	0.410686	0.0690902	0.0775977	0.0196806	0.0146878	0.000166667	0.181056	0.388298	0.423142	0.112394	0.0761657
7	0.255	0.431	0.0856667	0.182833	0.032	0.0135	0	0.314	0.251579	0.591736	0.107513	0.0491719
8	0.3855	0.3225	0.0706667	0.171333	0.0443333	0.00483333	0.000833333	0.291167	0.328364	0.540866	0.115672	0.0150979
9	0.545002	0.306976	0.0546692	0.0691745	0.0220114	0.00216778	0	0.148023	0.278523	0.511558	0.19469	0.0152286
10	0.574862	0.334081	0.0132655	0.0332325	0.040052	0.00450696	0	0.091057	0.278258	0.387979	0.302852	0.0309109
11	0.714579	0.19412	0.00366057	0.055647	0.0264933	0.00549945	0	0.0913003	0.0616246	0.73535	0.173109	0.029916
12	0.650949	0.301206	0.0158404	0.0165033	0.0133339	0.00216681	0	0.0478445	0.431405	0.335643	0.200213	0.0327381
13	0.51522	0.282878	0.00583653	0.112539	0.0751897	0.00833667	0	0.201902	0.0245741	0.622823	0.313061	0.0395422
14	0.163573	0.098954	0.000666667	0.360573	0.282401	0.0938324	0	0.737473	0.00112202	0.49862	0.372644	0.127615
15	0.139344	0.0539885	0	0.436453	0.204369	0.165846	0	0.806668	0	0.543968	0.247199	0.208833
16	0.0716935	0.0288396	0	0.416866	0.267714	0.214887	0	0.899467	0	0.459404	0.295082	0.245514
17	0.0727037	0.0358554	0	0.405029	0.161578	0.324834	0	0.891441	0	0.449367	0.187058	0.363576
18	0.0997718	0.0268581	0	0.452787	0.12215	0.298433	0	0.87337	0	0.510117	0.141118	0.348765
19	0.087	0.0228333	0	0.456333	0.115	0.318833	0	0.890167	0	0.512407	0.128608	0.358986
20	0.0628333	0.0145	0	0.463167	0.125167	0.334333	0	0.922667	0	0.49559	0.134837	0.369573
21	0.0868428	0.0240056	0	0.476334	0.119369	0.293449	0	0.889152	0	0.52586	0.133537	0.340603
22	0.0625423	0.0171795	0	0.46916	0.140984	0.309967	0.000166945	0.920111	0	0.503832	0.154378	0.34179
23	0.104667	0.0195	0	0.480333	0.0858333	0.309667	0	0.875833	0	0.5321	0.0983787	0.369521
SDs	0	1	2	3	4	5	-1	TST	U (% TST)	I (% TST)	S (% TST)	R (% TST)
0	0.296691	0.2746	0.00186339	0.0895251	0.0341545	0.0318647	0	0.152384	0.0187905	0.16472	0.0961543	0.0853545
1	0.352814	0.288676	0.0278031	0.0938827	0.0594137	0.0536066	0	0.189932	0.255206	0.0617633	0.147873	0.133091
2	0.359329	0.288639	0.0169382	0.212461	0.0834021	0.066998	0.000479016	0.340941	0.0733561	0.110012	0.150182	0.082105
3	0.183708	0.179731	0.0310443	0.128503	0.0464556	0.0533854	0.000745356	0.210533	0.313232	0.155582	0.0963564	0.0904094
4	0.229452	0.221784	0.00482327	0.0937298	0.0256404	0.025681	0	0.148087	0.284936	0.139868	0.0832572	0.0838475
5	0.109835	0.185907	0.0329314	0.0688197	0.0252577	0.046002	0.000372678	0.119589	0.268686	0.122558	0.121489	0.130521
6	0.167872	0.201207	0.0653135	0.0340601	0.0230388	0.026644	0.000372678	0.0653331	0.299635	0.105069	0.15056	0.133293
7	0.154818	0.103984	0.0856722	0.0521936	0.029841	0.0196885	0	0.102207	0.203867	0.0830346	0.0971007	0.0736329
8	0.0584956	0.0873312	0.0411906	0.122152	0.0520597	0.00947218	0.00144338	0.133098	0.247899	0.14459	0.111822	0.0282635
9	0.216521	0.129007	0.0859238	0.0768215	0.018339	0.00286316	0	0.13141	0.243704	0.245472	0.208482	0.0214094
10	0.226905	0.214645	0.0182624	0.0372243	0.0676296	0.00917459	0	0.110254	0.297495	0.0706377	0.304575	0.0441169
11	0.154606	0.146042	0.00818527	0.0930071	0.0488504	0.0113898	0	0.152944	0.106737	0.229282	0.160739	0.0381968
12	0.215131	0.189046	0.0217894	0.0182049	0.0275187	0.00439376	0	0.0493327	0.373732	0.0397891	0.291081	0.0463025
13	0.274066	0.214504	0.00786843	0.0645453	0.0696059	0.00620931	0	0.109179	0.0280462	0.266433	0.258406	0.023053
14	0.0978354	0.0515056	0.00149071	0.0541173	0.139213	0.0905116	0	0.143632	0.00250891	0.091329	0.11858	0.118777
15	0.100848	0.0546845	0	0.131497	0.102864	0.0721472	0	0.129442	0	0.141558	0.100691	0.085052
16	0.0626948	0.0227913	0	0.127861	0.117337	0.0881273	0	0.0768903	0	0.130259	0.114397	0.116056
17	0.0486087	0.026256	0	0.144153	0.113331	0.197435	0	0.0741281	0	0.137972	0.146001	0.231367
18	0.0740472	0.0132729	0	0.145671	0.0610824	0.0979427	0	0.0796424	0	0.115423	0.0763524	0.133378
19	0.0905991	0.0217355	0	0.0987695	0.062708	0.129634	0	0.110125	0	0.0849233	0.0640124	0.139748
20	0.0765162	0.013688	0	0.118827	0.054897	0.0731233	0	0.0828138	0	0.0928804	0.0554951	0.113132
21	0.100801	0.009738	0	0.147784	0.0774865	0.0708932	0	0.107215	0	0.126638	0.0811848	0.12362
22	0.052414	0.0106371	0	0.145357	0.0989562	0.0904742	0.0003733	0.0616769	0	0.129508	0.108256	0.117234
23	0.117632	0.0135221	0	0.181468	0.0324251	0.0656791	0	0.127646	0	0.145103	0.0337376	0.139328
BIRD 1	0	1	2	3	4	5	-1	TST	U (% TST)	I (% TST)	S (% TST)	R (% TST)
0	0.3875	0.311667	0	0.175	0.0558333	0.07	0	0.300833	0	0.581717	0.185596	0.232687
1	0.401667	0.235	0	0.203333	0.0641667	0.0958333	0	0.363333	0	0.559633	0.176606	0.263761
2	0.16388	0.408027	0.0401338	0.190635	0.175585	0.0217391	0	0.428094	0.09375	0.445312	0.410156	0.0507812
3	0.495	0.3325	0.0325	0.0966667	0.0283333	0.0133333	0.00166667	0.170833	0.190244	0.565854	0.165854	0.0780488
4	0.430833	0.283333	0.0158333	0.183333	0.0416667	0.045	0	0.285833	0.0553936	0.641399	0.145773	0.157434
5	0.461667	0.406667	0.0025	0.0783333	0.045	0.00583333	0	0.131667	0.0189873	0.594937	0.341772	0.0443038
6	0.58	0.264167	0.0208333	0.0675	0.0566667	0.01	0.000833333	0.155	0.134409	0.435484	0.365591	0.0645161
7	0.4225	0.278333	0.005	0.196667	0.0733333	0.0241667	0	0.299167	0.0167131	0.657382	0.245125	0.0807799
8	0.419167	0.2475	0.0516667	0.1925	0.0675	0.0216667	0	0.333333	0.155	0.5775	0.2025	0.065
9	0.750833	0.156667	0.0308333	0.0341667	0.0275	0	0	0.0925	0.333333	0.369369	0.297297	0
10	0.475833	0.376667	0.0358333	0.0658333	0.0441667	0.00166667	0	0.1475	0.242938	0.446328	0.299435	0.0112994
11	0.762063	0.138935	0.0183028	0.0590682	0.0199667	0.00166389	0	0.0990017	0.184874	0.596639	0.201681	0.0168067
12	0.69558	0.237698	0.0425354	0.0200167	0.00333611	0.000834028	0	0.0667223	0.6375	0.3	0.05	0.0125
13	0.658048	0.0433695	0.0191827	0.149291	0.116764	0.0133445	0	0.298582	0.0642458	0.5	0.391061	0.0446927
14	0.120934	0.104254	0	0.284404	0.275229	0.215179	0	0.774812	0	0.367061	0.355221	0.277718
15	0.133445	0.0108424	0	0.267723	0.321935	0.266055	0	0.855713	0	0.312865	0.376218	0.310916
16	0.160967	0.0375313	0	0.196831	0.28357	0.321101	0	0.801501	0	0.245578	0.353798	0.400624
17	0.108424	0.0508757	0	0.197665	0.0533778	0.589658	0	0.840701	0	0.235119	0.0634921	0.701389
18	0.154167	0.0225	0	0.35	0.06	0.413333	0	0.823333	0	0.425101	0.0728745	0.502024
19	0.0758333	0.0316667	0	0.331667	0.0433333	0.5175	0	0.8925	0	0.371615	0.0485528	0.579832
20	0.195	0.0266667	0	0.271667	0.0841667	0.4225	0	0.778333	0	0.349036	0.108137	0.542827
21	0.2625	0.0316667	0	0.229167	0.0983333	0.378333	0	0.705833	0	0.324675	0.139315	0.536009
22	0.1425	0.0275	0	0.276667	0.166667	0.386667	0	0.83	0	0.333333	0.200803	0.465863
23	0.303333	0.0341667	0	0.206667	0.0666667	0.389167	0	0.6625	0	0.31195	0.100629	0.587421
BIRD 2	0	1	2	3	4	5	-1	TST	U (% TST)	I (% TST)	S (% TST)	R (% TST)
0	0.985833	0.00583333	0	0.00833333	0	0	0	0.00833333	0	1	0	0
1	0.99	0.01	0	0	0	0	0	0
2	0.936561	0.0626043	0	0	0	0	0.000834725	0
3	0.811667	0.1575	0.0175	0.0133333	0	0	0	0.0308333	0.567568	0.432432	0	0
4	0.873333	0.104167	0.00416667	0.015	0.0025	0.000833333	0	0.0225	0.185185	0.666667	0.111111	0.037037
5	0.6575	0.1575	0.0816667	0.100833	0.00166667	0	0.000833333	0.184167	0.443439	0.547511	0.00904977	0
6	0.556761	0.223706	0.105175	0.110184	0.00417362	0	0	0.219533	0.479087	0.501901	0.0190114	0
7	0.0375	0.485833	0.211667	0.261667	0.00333333	0	0	0.476667	0.444056	0.548951	0.00699301	0
8	0.393333	0.390833	0.0925	0.12	0	0	0.00333333	0.2125	0.435294	0.564706	0	0
9	0.7575	0.2375	0.000833333	0.00416667	0	0	0	0.005	0.166667	0.833333	0	0
10	0.911248	0.0887522	0	0	0	0	0	0
11	0.856667	0.14	0	0.00333333	0	0	0	0.00333333	0	1	0	0
12	1	0	0	0	0	0	0	0
13	0.616667	0.264167	0.005	0.113333	0.000833333	0	0	0.119167	0.041958	0.951049	0.00699301	0
14	0.213211	0.0744147	0	0.400502	0.144649	0.167224	0	0.712375	0	0.562207	0.203052	0.234742
15	0.255	0.0258333	0	0.364167	0.1775	0.1775	0	0.719167	0	0.506373	0.246813	0.246813
16	0.075	0.0633333	0	0.444167	0.151667	0.265833	0	0.861667	0	0.515474	0.176015	0.308511
17	0.05	0.0191667	0	0.384167	0.100833	0.445833	0	0.930833	0	0.412713	0.108326	0.478962
18	0.146912	0.0409015	0	0.331386	0.0959933	0.384808	0	0.812187	0	0.408016	0.118191	0.473792
19	0.245	0.0558333	0	0.380833	0.0958333	0.2225	0	0.699167	0	0.544696	0.137068	0.318236
20	0.0258333	0.00833333	0	0.505833	0.119167	0.340833	0	0.965833	0	0.523727	0.123382	0.35289
21	0.0808333	0.0366667	0	0.555	0.035	0.2925	0	0.8825	0	0.628895	0.0396601	0.331445
22	0.0759599	0.0233723	0	0.424875	0.0509182	0.424875	0	0.900668	0	0.471733	0.0565338	0.471733
23	0.1075	0.0233333	0	0.440833	0.0641667	0.364167	0	0.869167	0	0.507191	0.0738255	0.418984
BIRD 3	0	1	2	3	4	5	-1	TST	U (% TST)	I (% TST)	S (% TST)	R (% TST)
0	0.262967	0.661037	0	0.0566948	0.0120627	0.00723764	0	0.0759952	0	0.746032	0.15873	0.0952381
1								0
2	0.679185	0.170601	0.0203863	0.10515	0.00858369	0.0160944	0	0.150215	0.135714	0.7	0.0571429	0.107143
3	0.406667	0.485833	0.0833333	0.0233333	0.000833333	0	0	0.1075	0.775194	0.217054	0.00775194	0
4	0.6225	0.363333	0.0075	0.00666667	0	0	0	0.0141667	0.529412	0.470588	0	0
5	0.388333	0.546667	0.0333333	0.025	0.00666667	0	0	0.065	0.512821	0.384615	0.102564	0
6	0.298831	0.451586	0.162771	0.0742905	0.0108514	0.00166945	0	0.249583	0.652174	0.297659	0.0434783	0.00668896
7	0.260833	0.410833	0.123333	0.155833	0.0491667	0	0	0.328333	0.375635	0.474619	0.149746	0
8	0.388333	0.373333	0.0925	0.113333	0.03	0.0025	0	0.238333	0.388112	0.475524	0.125874	0.0104895
9	0.24	0.456667	0.206667	0.09	0.00583333	0.000833333	0	0.303333	0.681319	0.296703	0.0192308	0.00274725
10	0.295478	0.652997	0.0304942	0.0210305	0	0	0	0.0515247	0.591837	0.408163	0	0
11	0.5475	0.4525	0	0	0	0	0	0
12	0.470833	0.473333	0.0366667	0.0183333	0.000833333	0	0	0.0558333	0.656716	0.328358	0.0149254	0
13	0.15	0.55	0.005	0.199167	0.0833333	0.0125	0	0.3	0.0166667	0.663889	0.277778	0.0416667
14	0.0116861	0.0250417	0	0.423205	0.51419	0.0258765	0	0.963272	0	0.439341	0.533795	0.0268631
15	0.0133333	0.015	0	0.5875	0.303333	0.0808333	0	0.971667	0	0.604631	0.312178	0.0831904
16	0.00666667	0.00333333	0	0.430833	0.46	0.0991667	0	0.99	0	0.435185	0.464646	0.100168
17	0.0133333	0.000833333	0	0.5825	0.109167	0.294167	0	0.985833	0	0.590871	0.110735	0.298394
18	0.00918197	0.00751252	0	0.660267	0.132721	0.190317	0	0.983306	0	0.671477	0.134975	0.193548
19	0.0391667	0.00583333	0	0.555833	0.213333	0.185833	0	0.955	0	0.582024	0.223386	0.19459
20	0.0133333	0.0025	0	0.589167	0.156667	0.238333	0	0.984167	0	0.598645	0.159187	0.242168
21	0.0225	0.0141667	0	0.615833	0.110833	0.236667	0	0.963333	0	0.639273	0.115052	0.245675
22	0	0	0	0.63773	0.0993322	0.262104	0.000834725	0.999165	0	0.638262	0.0994152	0.262322
23	0.0025	0.000833333	0	0.690833	0.07	0.235833	0	0.996667	0	0.693144	0.0702341	0.236622
BIRD 4	0	1	2	3	4	5	-1	TST	U (% TST)	I (% TST)	S (% TST)	R (% TST)
0	0.4175	0.223333	0	0.2275	0.075	0.0566667	0	0.359167	0	0.633411	0.208817	0.157773
1	0.360833	0.251667	0	0.169167	0.125833	0.0925	0	0.3875	0	0.436559	0.324731	0.23871
2	0.13856	0.0373747	0	0.52598	0.139471	0.157703	0.000911577	0.823154	0	0.638981	0.169435	0.191584
3	0.350833	0.085	0.000833333	0.3275	0.1125	0.123333	0	0.564167	0.0014771	0.580502	0.199409	0.218612
4	0.433333	0.274167	0.0133333	0.1775	0.0525	0.0491667	0	0.2925	0.045584	0.606838	0.179487	0.168091
5	0.445833	0.206667	0	0.186667	0.0566667	0.104167	0	0.3475	0	0.53717	0.16307	0.29976
6	0.418197	0.382304	0.00250417	0.108514	0.0267112	0.0617696	0	0.199499	0.0125523	0.543933	0.133891	0.309623
7	0.178333	0.559167	0.0116667	0.178333	0.0291667	0.0433333	0	0.2625	0.0444444	0.679365	0.111111	0.165079
8	0.2875	0.209167	0.0075	0.3725	0.123333	0	0	0.503333	0.0149007	0.740066	0.245033	0
9	0.471667	0.2575	0.0275	0.194167	0.0425	0.00666667	0	0.270833	0.101538	0.716923	0.156923	0.0246154
10	0.550918	0.192821	0	0.0792988	0.156093	0.0208681	0	0.25626	0	0.309446	0.609121	0.0814332
11	0.553333	0.0925	0	0.215833	0.1125	0.0258333	0	0.354167	0	0.609412	0.317647	0.0729412
12	0.489167	0.394167	0	0.0441667	0.0625	0.01	0	0.116667	0	0.378571	0.535714	0.0857143
13	0.321667	0.444167	0	0.0575	0.164167	0.0125	0	0.234167	0	0.245552	0.701068	0.0533808
14	0.221202	0.13606	0	0.352254	0.261269	0.0292154	0	0.642738	0	0.548052	0.406494	0.0454545
15	0.2225	0.138333	0	0.415833	0.11	0.113333	0	0.639167	0	0.650587	0.172099	0.177314
16	0.0975	0.0216667	0	0.511667	0.213333	0.155833	0	0.880833	0	0.580889	0.242195	0.176916
17	0.135	0.0675	0	0.371667	0.338333	0.0875	0	0.7975	0	0.46604	0.424242	0.109718
18	0.159432	0.0258765	0	0.370618	0.221202	0.222871	0	0.814691	0	0.454918	0.271516	0.273566
19	0.0541667	0.0025	0	0.469167	0.1275	0.346667	0	0.943333	0	0.49735	0.135159	0.367491
20	0.0633333	0.00333333	0	0.444167	0.200833	0.288333	0	0.933333	0	0.475893	0.215179	0.308929
21	0.04	0.0208333	0	0.480833	0.246667	0.211667	0	0.939167	0	0.511979	0.262644	0.225377
22	0.0509182	0.015025	0	0.417362	0.301336	0.215359	0	0.934057	0	0.446828	0.322609	0.230563
23	0.0708333	0.0108333	0	0.478333	0.141667	0.298333	0	0.918333	0	0.520871	0.154265	0.324864
BIRD 5	0	1	2	3	4	5	-1	TST	U (% TST)	I (% TST)	S (% TST)	R (% TST)
0	0.286667	0.614167	0.00416667	0.0808333	0.0025	0.0116667	0	0.0991667	0.0420168	0.815126	0.0252101	0.117647
1	0.175023	0.69918	0.0556062	0.0638104	0.00364631	0.00273473	0	0.125798	0.442029	0.507246	0.0289855	0.0217391
2	0.225	0.725833	0.00833333	0.0275	0.0133333	0	0	0.0491667	0.169492	0.559322	0.271186	0
3	0.416667	0.465	0.0258333	0.0675	0.02	0.005	0	0.118333	0.21831	0.570423	0.169014	0.0422535
4	0.275	0.705	0.0133333	0.00666667	0	0	0	0.02	0.666667	0.333333	0	0
5	0.39399	0.554257	0.0275459	0.0158598	0.00834725	0	0	0.0517529	0.532258	0.306452	0.16129	0
6	0.186667	0.731667	0.0541667	0.0275	0	0	0	0.0816667	0.663265	0.336735	0	0
7	0.375833	0.420833	0.0766667	0.121667	0.005	0	0	0.203333	0.377049	0.598361	0.0245902	0
8	0.439167	0.391667	0.109167	0.0583333	0.000833333	0	0.000833333	0.168333	0.648515	0.346535	0.0049505	0
9	0.505008	0.426544	0.00751252	0.0233723	0.0342237	0.0033389	0	0.0684474	0.109756	0.341463	0.5	0.0487805
10	0.640833	0.359167	0	0	0	0	0	0
11	0.853333	0.146667	0	0	0	0	0	0
12	0.599167	0.400833	0	0	0	0	0	0
13	0.829716	0.112688	0	0.0434057	0.0108514	0.0033389	0	0.057596	0	0.753623	0.188406	0.057971
14	0.250833	0.155	0.00333333	0.3425	0.216667	0.0316667	0	0.594167	0.0056101	0.576438	0.364656	0.0532959
15	0.0724396	0.0799334	0	0.547044	0.109076	0.191507	0	0.847627	0	0.645383	0.128684	0.225933
16	0.0183333	0.0183333	0	0.500833	0.23	0.2325	0	0.963333	0	0.519896	0.238754	0.241349
17	0.0567613	0.0409015	0	0.489149	0.206177	0.207012	0	0.902337	0	0.542091	0.228492	0.229417
18	0.0291667	0.0375	0	0.551667	0.100833	0.280833	0	0.933333	0	0.591071	0.108036	0.300893
19	0.0208333	0.0183333	0	0.544167	0.095	0.321667	0	0.960833	0	0.566349	0.0988725	0.334779
20	0.0166667	0.0316667	0	0.505	0.065	0.381667	0	0.951667	0	0.530648	0.0683012	0.401051
21	0.0283806	0.0166945	0	0.500835	0.10601	0.34808	0	0.954925	0	0.524476	0.111014	0.36451
22	0.0433333	0.02	0	0.589167	0.0866667	0.260833	0	0.936667	0	0.629004	0.0925267	0.27847
23	0.0391667	0.0283333	0	0.585	0.0866667	0.260833	0	0.9325	0	0.627346	0.0929401	0.279714

## Sheet: Fig 2c Halves of night
HALVES OF NIGHT
Wake		Bird 1	Bird 2	Bird 3	Bird 4	Bird 5
	0	0.202867	0.183858	0.0180742	0.201932	0.179651
	1	0.184949	0.113119	0.0199439	0.0557806	0.0306949
Drowsy		Bird 1	Bird 2	Bird 3	Bird 4	Bird 5
	0	0.0428482	0.0899034	0.0425366	0.133375	0.0765036
	1	0.0302275	0.0288252	0.0288252	0.013244	0.0250857
Unihemispheric sleep		Bird 1	Bird 2	Bird 3	Bird 4	Bird 5
	0	0.000155812	0.000934871	0	0	0.000623247
	1	0	0	0	0	0
Intermediate sleep		Bird 1	Bird 2	Bird 3	Bird 4	Bird 5
	0	0.242132	0.358211	0.522281	0.352446	0.427859
	1	0.272047	0.454815	0.596915	0.457931	0.543627
Slow wave sleep		Bird 1	Bird 2	Bird 3	Bird 4	Bird 5
	0	0.201932	0.114366	0.286226	0.216267	0.159863
	1	0.0914615	0.0793082	0.136179	0.200841	0.0855407
REM		Bird 1	Bird 2	Bird 3	Bird 4	Bird 5
	0	0.310065	0.252727	0.130882	0.0959801	0.1555
	1	0.421315	0.323933	0.217981	0.272203	0.315051
TST		Bird 1	Bird 2	Bird 3	Bird 4	Bird 5
	0	0.754285	0.726239	0.939389	0.664693	0.743845
	1	0.784824	0.858055	0.951075	0.930975	0.944219
AS % of TST
Unihemispheric sleep		Bird 1	Bird 2	Bird 3	Bird 4	Bird 5
	0	0.000206569	0.00128728	0	0	0.000837872
	1	0	0	0	0	0
Intermediate sleep		Bird 1	Bird 2	Bird 3	Bird 4	Bird 5
	0	0.321008	0.493242	0.555979	0.530239	0.575199
	1	0.346635	0.530053	0.627621	0.491883	0.575743
Slow wave sleep		Bird 1	Bird 2	Bird 3	Bird 4	Bird 5
	0	0.267713	0.157477	0.304694	0.325363	0.214914
	1	0.116538	0.0924278	0.143185	0.215732	0.0905941
REM		Bird 1	Bird 2	Bird 3	Bird 4	Bird 5
	0	0.411072	0.347994	0.139327	0.144398	0.209049
	1	0.536827	0.37752	0.229194	0.292385	0.333663
HALVES OF NIGHTTIME SLEEP
Unihemispheric sleep		Bird 1	Bird 2	Bird 3	Bird 4	Bird 5
	0	0.00020247	0.00118017	0	0	0.000737735
	1	0	0	0	0	0
Intermediate sleep		Bird 1	Bird 2	Bird 3	Bird 4	Bird 5
	0	0.324965	0.490559	0.55671	0.523242	0.578015
	1	0.343187	0.535799	0.627328	0.492482	0.572667
Slow wave sleep		Bird 1	Bird 2	Bird 3	Bird 4	Bird 5
	0	0.266856	0.1607	0.304649	0.295312	0.196422
	1	0.114396	0.0837923	0.142245	0.227495	0.0940612
REM		Bird 1	Bird 2	Bird 3	Bird 4	Bird 5
	0	0.407977	0.347561	0.138642	0.181445	0.224825
	1	0.542417	0.380409	0.230427	0.280023	0.333272

## Sheet: Fig 2d Hours of night
BY HOUR OF NIGHT
MEANS
Hour	0	1	2	3	4	5	TST	U (% TST)	I (% TST)	S (% TST)	R (% TST)	2 by hr of sleep	3 by hr of sleep	4 by hr of sleep	5 by hr of sleep
0	0.413955	0.226852	0.00216556	0.202422	0.118947	0.0356586	0.359194	0.00646732	0.563155	0.33379	0.0965877	0.00183333	0.539667	0.336167	0.122333
1	0.125096	0.0968548	0.000333056	0.397785	0.283996	0.0959359	0.77805	0.000483676	0.518085	0.358745	0.122686	0	0.527833	0.243167	0.229
2	0.108424	0.0406336	0	0.433849	0.218371	0.198722	0.850942	0	0.513407	0.250287	0.236307	0	0.4185	0.321333	0.260167
3	0.0663066	0.0316489	0	0.39753	0.241656	0.262859	0.902045	0	0.432923	0.263973	0.303104	0	0.458333	0.1465	0.395167
4	0.0982615	0.0321474	0	0.410176	0.139441	0.319974	0.869591	0	0.46263	0.170386	0.366984	0	0.543833	0.110667	0.3455
5	0.0790098	0.0246703	0	0.476252	0.12789	0.292178	0.89632	0	0.526194	0.140897	0.332909	0	0.509167	0.152667	0.338167
6	0.0975853	0.0219817	0	0.456619	0.119567	0.304246	0.880433	0	0.515919	0.133697	0.350384	0	0.490167	0.157167	0.352667
7	0.0582848	0.014821	0	0.481765	0.102748	0.342381	0.926894	0	0.512074	0.111025	0.376901	0	0.508833	0.123667	0.3675
8	0.086111	0.0249834	0	0.442968	0.155084	0.290854	0.888906	0	0.49081	0.173126	0.336065	0	0.50031	0.106111	0.393578
9	0.0736412	0.014831	0	0.481455	0.103689	0.326217	0.911361	0	0.517535	0.116484	0.365981
10	0.173022	0.115903	0.000832639	0.407993	0.0882598	0.213988	0.711074	0.00112233	0.563511	0.121151	0.314216
SDs
Hour	0	1	2	3	4	5	TST	U (% TST)	I (% TST)	S (% TST)	R (% TST)	2 by hr of sleep	3 by hr of sleep	4 by hr of sleep	5 by hr of sleep
0	0.197409	0.150378	0.00200497	0.102147	0.0858733	0.0291452	0.167223	0.00681512	0.198968	0.23886	0.0576566	0.00223607	0.0972586	0.120027	0.0952909
1	0.0706936	0.0804296	0.000744735	0.0895928	0.114885	0.0786121	0.134253	0.00108153	0.11995	0.0998791	0.0990138	0	0.126861	0.114615	0.0961181
2	0.0830288	0.0285243	0	0.124017	0.131389	0.090015	0.0986225	0	0.146098	0.129611	0.100841	0	0.126769	0.112741	0.180329
3	0.0631902	0.0192071	0	0.135567	0.0986608	0.144025	0.0781503	0	0.127944	0.0930648	0.193115	0	0.105887	0.0799423	0.159826
4	0.0815776	0.0202597	0	0.158712	0.104738	0.164714	0.101283	0	0.134636	0.150665	0.196283	0	0.102691	0.0417724	0.107959
5	0.0658145	0.0154181	0	0.114561	0.0588332	0.0857593	0.0773816	0	0.0835366	0.0576405	0.116384	0	0.101007	0.0829688	0.142542
6	0.0726484	0.0153599	0	0.0859407	0.0613351	0.0924241	0.0832631	0	0.0610792	0.0629369	0.12068	0	0.105645	0.107488	0.13192
7	0.0745549	0.0134182	0	0.144839	0.0615664	0.0802135	0.0760519	0	0.125202	0.0645359	0.122107	0	0.119589	0.064742	0.104245
8	0.0752934	0.0133823	0	0.126809	0.102641	0.0890295	0.0858755	0	0.107848	0.110094	0.132061	0	0.201282	0.0573503	0.236185
9	0.0940849	0.00929794	0	0.172844	0.066315	0.0805788	0.101198	0	0.143787	0.0747693	0.115556
10	0.133484	0.0828913	0.00186184	0.143593	0.0432131	0.0619659	0.122395	0.00250962	0.144866	0.0441322	0.130067

## Sheet: Fig 2e Totals - nighttime
NIGHTTIME TOTALS
	0	1	2	3	4	5	-1	TST	U (% TST)	I (% TST)	S (% TST)	R (% TST)
Bird 1	0.193983	0.0361624	7.79362e-05	0.25719	0.146754	0.365833		0.769854	0.000101235	0.334076	0.190626	0.475197
Bird 2	0.14816	0.0594198	0.000467873	0.406425	0.0969276	0.2886		0.79242	0.000590435	0.512891	0.122318	0.3642
Bird 3	0.022598	0.0348321	0.000311696	0.557625	0.210473	0.174082	7.79241e-05	0.942492	0.000330715	0.591649	0.223315	0.184704
Bird 4	0.128907	0.073338	0	0.405191	0.208402	0.184163		0.797755	0	0.507913	0.261235	0.230852
Bird 5	0.105132	0.0507749	0.000311502	0.485632	0.122654	0.235496		0.844093	0.000369038	0.57533	0.145309	0.278993
Mean	0.119756	0.0509054	0.000233802	0.422412	0.157042	0.249635	7.79241e-05	0.829323	0.000278285	0.504372	0.188561	0.306789
SD	0.0633517	0.016213	0.000190953	0.111949	0.0509774	0.0793958	#DIV/0!	0.0687754	0.00023303	0.10215	0.0564634	0.115218

## Sheet: Fig 2f Totals - daytime
DAYTIME TOTALS
	0	1	2	3	4	5	-1	TST	U (% TST)	I (% TST)	S (% TST)	R (% TST)
Bird 1	0.516016	0.273763	0.0229818	0.115495	0.0480469	0.0235026	0.000195313	0.210026	0.109423	0.549907	0.228766	0.111903
Bird 2	0.756842	0.155458	0.0387543	0.047625	0.00088078	6.29129e-05	0.000377477	0.0873231	0.443804	0.545389	0.0100865	0.000720461
Bird 3	0.40199	0.464013	0.0684408	0.0543776	0.00966393	0.0015145		0.133997	0.510764	0.405813	0.0721206	0.0113025
Bird 4	0.389124	0.247051	0.00479465	0.211595	0.0905937	0.0567788	6.30875e-05	0.363763	0.0131807	0.581686	0.249046	0.156087
Bird 5	0.426867	0.49959	0.0285967	0.0367401	0.00662837	0.00151506	6.31273e-05	0.0734802	0.389175	0.5	0.0902062	0.0206186
Mean	0.498168	0.327975	0.0327136	0.0931666	0.0311627	0.0166748	0.000174751	0.173718	0.29327	0.516559	0.130045	0.0601264
SD	0.152852	0.147655	0.0234736	0.0729495	0.0380731	0.0244466	0.000148828	0.118875	0.218753	0.0684173	0.103971	0.0695756

## Sheet: Fig 2g Totals - 24 hrs
24 HOURS TOTALS
	0	1	2	3	4	5	-1	TST	U (% TST)	I (% TST)	S (% TST)	R (% TST)
Bird 1	0.369405	0.165709	0.0125559	0.179967	0.092963	0.179293	0.000106406	0.46478	0.0270147	0.38721	0.200015	0.38576
Bird 2	0.484961	0.112546	0.0216529	0.208	0.0437583	0.128873	0.00020887	0.402284	0.0538249	0.517047	0.108775	0.320353
Bird 3	0.21787	0.258164	0.0355377	0.297221	0.106538	0.0846315	3.74476e-05	0.523929	0.0678293	0.567293	0.203345	0.161532
Bird 4	0.272667	0.16931	0.00264928	0.298219	0.143375	0.113745	3.4859e-05	0.557988	0.00474792	0.534454	0.25695	0.203848
Bird 5	0.282776	0.298602	0.0159306	0.237773	0.0585631	0.10632	3.4859e-05	0.418587	0.038058	0.568038	0.139907	0.253997
Mean	0.325536	0.200866	0.0176653	0.244236	0.0890396	0.122573	8.44882e-05	0.473513	0.0382949	0.514808	0.181798	0.265098
SD	0.104351	0.0756101	0.0121441	0.0529313	0.0395384	0.0354914	7.59772e-05	0.0667918	0.0243216	0.0745995	0.058162	0.08974
							HOURS:	11.3643
								1.603

## Sheet: Fig 3a Durations
DURATION OF SLEEP/WAKE EPISODES (s)
BIRD 1
Hour of night	Wake	Drowsy	Unihemispheric sleep	Intermediate sleep	Slow wave sleep	REM
0	22.9138	4.83333	3	6.51493	6.63636	8.10811
1	7.5	6.10714		4.96216	7.50867	7.82278
2	52.5	6		7.27907	10.7568	17.6418
3	24.6	8.08696		5.85294	7.2	24.8261
4	10.9535	4.58824		6.59559	4.69565	16.6216
5	24.7143	4.66667		12.3962	4.35849	26.6111
6	16.8	6.52174		11.8835	3.79412	23.087
7	22.9	6		9.15	5.55738	33.0612
8	24	6.13636		7.52727	6.4	27.54
9	28.5	5.8125		7.83621	6.30435	26.7
10	37.3333	11.5238		6	5.02941	19.6842
BIRD 2
Hour of night	Wake	Drowsy	Unihemispheric sleep	Intermediate sleep	Slow wave sleep	REM
0	30.1935	15.9718	4.5	11.5417	3.81818	6.26087
1	46.7143	8.76923		7.5	4.53285	6.87
2	33.72	8.31818		6.99438	5.35537	9.16216
3	17	10.0714		7.88235	4.2	8.82979
4	19	6.35294		6.84	3.85185	13.475
5	21.12	6.6		8.64815	3.66964	9.75676
6	32.4545	5.31818		8.96296	3.93939	9.27
7	12.75	4.5		12.355	3.75824	11.25
8	22	7.2		10.6038	3.27273	10.5354
9	24.3333	7		11.6047	3.75	18.7912
10	389.118	7.28571		13.6071	3.75	16.8158
BIRD 3
Hour of night	Wake	Drowsy	Unihemispheric sleep	Intermediate sleep	Slow wave sleep	REM
0	21.7895	22.0385	6	8.34507	7.18868	8.18182									0
1	24	15		7.5	7.86207	4.275									0
2	12	6.33333		7.36929	6.77512	5									0
3	12	9		8.16216	7.81818	6.44595									0
4	31.5	10.5		11.4433	3.95238	7.32886									0
5	9	4.5		10.95	5.97581	6.68182									0
6	49	7.5		9.69565	5.63359	7.96552									0
7	42	9		11.9681	4.03846	7.85714									0
8	40.5	21		10.3706	5.0177	8.48571									0
9	9	3		16.1509	3.46552	7.8									1
10	122.25	72.4286		14.448	4.52632	8.78261									0
BIRD 4
Hour of night	Wake	Drowsy	Unihemispheric sleep	Intermediate sleep	Slow wave sleep	REM
0	109.286	47.25		3.96226	9.72222	3.42857
1	24.48	12.7222		7.80682	5.47297	4.56
2	28	10.9091		11.2952	3.99	7.12048
3	63.75	12		8.03226	5.34715	7.93548
4	49.125	9.26087		5.98352	6.32386	8.375
5	38.5714	17.4		7.3662	4.31915	9.50442
6	159	7		9.35	4.01575	11.3617
7	66	33		8.34184	5.04828	11.266
8	32.5	16.8		6.50617	5.19178	8.34247
9	22.7143	7		7.28767	4.55357	9.61111
10	66.6	25.5		8.82857	4.15217	8.17582
BIRD 5
Hour of night	Wake	Drowsy	Unihemispheric sleep	Intermediate sleep	Slow wave sleep	REM
0	90.1765	18	3	9.92727	5.18182	5.6
1	12.3947	11.8776	6	9.05202	5.33793	6.42857
2	33	29.25		12.1656	4.23077	8.44898
3	26.5	21.4286		6.60829	7.03448	7.54054
4	27	20.25		8.81416	4.34266	6.97368
5	17.4	19.8		10.6562	3.8625	8.66129
6	37.5	26		9.36	4.08511	8.9313
7	12.4286	19.2857		11.8039	3.24324	11.8306
8	24.8571	9		10.6221	5.01	13.6579
9	14	10.125		13.5192	3.64286	11.4894
10	13.95	22.4118	15	12.3493	3.87692	8.61429

## Sheet: Fig 3b Durations NREM
DURATION OF SLEEP/WAKE EPISODES with NREM lumped (s)
BIRD 1
Hour of night	Wake	Drowsy	Unihemispheric sleep		NREM	REM
0	22.9138	4.83333	3		18.6585	8.10811
1	7.5	6.10714			18.1721	7.82278
2	52.5	6			30.4286	17.6418
3	24.6	8.08696			15.8955	24.8261
4	10.9535	4.58824			9.4322	16.6216
5	24.7143	4.66667			22.3913	26.6111
6	16.8	6.52174			16.5714	23.087
7	22.9	6			20.6441	33.0612
8	24	6.13636			19.7727	27.54
9	28.5	5.8125			20.2727	26.7
10	37.3333	11.5238			10.2524	19.6842
BIRD 2
Hour of night	Wake	Drowsy	Unihemispheric sleep		NREM	REM
0	30.1935	15.9718	4.5		12.6522	6.26087
1	46.7143	8.76923			22.7339	6.87
2	33.72	8.31818			18.4643	9.16216
3	17	10.0714			14.1284	8.82979
4	19	6.35294			12.4711	13.475
5	21.12	6.6			15.5641	9.75676
6	32.4545	5.31818			17.215	9.27
7	12.75	4.5			25.1875	11.25
8	22	7.2			13.1912	10.5354
9	24.3333	7			18.3548	18.7912
10	389.118	7.28571			28.4348	16.8158
BIRD 3
Hour of night	Wake	Drowsy	Unihemispheric sleep		NREM	REM
0	21.7895	22.0385	6		42.66	8.18182
1	24	15			78.1463	4.275
2	12	6.33333			53.6308	5
3	12	9			37.44	6.44595
4	31.5	10.5			18.8255	7.32886
5	9	4.5			29.1573	6.68182
6	49	7.5			30.1648	7.96552
7	42	9			19.8837	7.85714
8	40.5	21			24.6226	8.48571
9	9	3			25.6389	7.8
10	122.25	72.4286			28.6667	8.78261
BIRD 4
Hour of night	Wake	Drowsy	Unihemispheric sleep		NREM	REM
0	109.286	47.25			29.52	3.42857
1	24.48	12.7222			38.6316	4.56
2	28	10.9091			23.6875	7.12048
3	63.75	12			42.5538	7.93548
4	49.125	9.26087			36.0984	8.375
5	38.5714	17.4			20.0339	9.50442
6	159	7			21.1263	11.3617
7	66	33			25.1809	11.266
8	32.5	16.8			35.7632	8.34247
9	22.7143	7			20.7105	9.61111
10	66.6	25.5			25.299	8.17582
BIRD 5
Hour of night	Wake	Drowsy	Unihemispheric sleep		NREM	REM
0	90.1765	18	3		27.5769	5.6
1	12.3947	11.8776	6		48.54	6.42857
2	33	29.25			22.0099	8.44898
3	26.5	21.4286			21.7168	7.54054
4	27	20.25			22.9744	6.97368
5	17.4	19.8			18.24	8.66129
6	37.5	26			17.0597	8.9313
7	12.4286	19.2857			17.0081	11.8306
8	24.8571	9			27.4074	13.6579
9	14	10.125			23.5312	11.4894
10	13.95	22.4118	15		23.8953	8.61429

## Sheet: Fig 3c Frequencies
FREQUENCY OF SLEEP/WAKE EPISODES (number per hour)
BIRD 1
Hour of night	Wake	Drowsy	Unihemispheric sleep	Intermediate sleep	Slow wave sleep	REM
0	58	18	1	134	99	37
1	56	56	0	185	173	79
2	6	3	0	129	111	67
3	25	23	0	102	65	69
4	43	34	0	136	46	111
5	21	18	0	106	53	54
6	30	23	0	103	34	69
7	30	9	0	100	61	49
8	32	22	0	110	75	50
9	30	16	0	116	69	50
10	18	63	0	119	68	57
BIRD 2
Hour of night	Wake	Drowsy	Unihemispheric sleep	Intermediate sleep	Slow wave sleep	REM
0	31	71	4	72	11	23
1	14	13	0	202	137	100
2	25	22	0	178	121	74
3	9	14	0	204	115	141
4	18	17	0	175	81	120
5	25	25	0	162	112	111
6	22	22	0	162	99	100
7	8	8	0	169	91	92
8	15	20	0	159	33	127
9	9	9	0	129	56	91
10	17	14	0	84	44	38
BIRD 3
Hour of night	Wake	Drowsy	Unihemispheric sleep	Intermediate sleep	Slow wave sleep	REM
0	19	52	2	142	106	11
1	1	1	0	238	203	40
2	5	9	0	241	209	60
3	1	1	0	222	165	74
4	2	2	0	194	63	149
5	2	2	0	200	124	88
6	3	4	0	207	131	87
7	1	1	0	188	78	126
8	2	2	0	197	113	105
9	1	1	0	159	58	105
10	4	7	0	125	57	69
BIRD 4
Hour of night	Wake	Drowsy	Unihemispheric sleep	Intermediate sleep	Slow wave sleep	REM
0	14	28	0	53	54	7
1	25	54	0	176	148	25
2	18	22	0	166	100	83
3	4	7	0	217	193	62
4	16	23	0	182	176	48
5	7	5	0	213	141	113
6	2	3	0	180	127	94
7	2	1	0	196	145	94
8	6	5	0	243	219	73
9	7	6	0	219	168	108
10	5	4	0	210	138	91
BIRD 5
Hour of night	Wake	Drowsy	Unihemispheric sleep	Intermediate sleep	Slow wave sleep	REM
0	17	22	2	55	33	15
1	38	49	1	173	145	21
2	7	8	0	163	78	98
3	6	7	0	217	145	111
4	4	4	0	226	143	114
5	5	5	0	192	80	124
6	2	3	0	200	94	131
7	7	7	0	153	37	124
8	7	5	0	172	100	76
9	6	8	0	156	70	94
10	20	34	1	146	65	70

[truncated: 18 more sheets: Fig 3d Frequencies NREM, Fig 3e-g Transitions, Fig 4a-c, S2 Power spectra, Fig 4d-e SWA,TST,nPeaks by hr, Fig 4f-g SWA,nPeaks by stage, Fig 6c-d Ultradian rhythms, Fig 6e Score by ultr. phase, Fig 6f-g Ultr. phase by score, Fig 7b-c slow waves, Fig 7e-f eye movements, Fig8 automated scoring, Fig 9b LL video scores, Fig 9c LL sleep durations, Fig 9d LL motion actigrams, Fig 9e LL motion periodograms, Fig 9f-g LL by-hour SWA,TST, Fig 9h-i nPeaks LL, Fig S3 Ultradian rhythm vs REM%]
